# Supplementary material for: Innovative Control of Biofilms on Stainless Steel Surfaces Using Electrolyzed Water in the Dairy Industry
Source: PubMed Central journal article supplement (PMC7825347; doi:10.3390/foods10010103), 2021-01-06
Supplement: foods-10-00103-s001.pdf [file foods-10-00103-s001.pdf]

## SUPPLEMENTARY MATERIAL

**Table S1.** Complete factorial design 2<sup>3</sup> with 4 center points for the cleaning of SSP using AEW

| Factor                        | Levels |     |     |
|-------------------------------|--------|-----|-----|
|                               | -1     | 0   | 1   |
| Time (min)                    | 10     | 20  | 30  |
| AEW concentration (mg/L NaOH) | 300    | 400 | 500 |
| Temperature (°C)              | 30     | 40  | 50  |

The experimental unit consisted of SSP plates with type A deposits, and developed biofilms, because they showed microbial population high enough to evaluate the cleaning and disinfection process. All treatments received a final disinfection process using 200 ppm of NEW, at 20 °C for 5 min. For all treatments the response variable was microbial population by plate count agar for 24 h at 30°C.

**Table S2.** Microbial populations from each treatment of factorial design 2<sup>3</sup> with 4 center points.

| AEW Concentration<br>mg/L | Time<br>min | Temperature<br>°C | Log reduction/ cm <sup>2</sup> |
|---------------------------|-------------|-------------------|--------------------------------|
| 300                       | 10          | 30                | 7.30                           |
| 300                       | 10          | 30                | 7.07                           |
| 300                       | 10          | 30                | 7.25                           |
| 300                       | 10          | 50                | 7.30                           |
| 300                       | 10          | 50                | 7.47                           |
| 300                       | 10          | 50                | 7.47                           |
| 300                       | 30          | 30                | 7.38                           |
| 300                       | 30          | 30                | 7.30                           |
| 300                       | 30          | 30                | 7.47                           |
| 300                       | 30          | 50                | 7.30                           |
| 300                       | 30          | 50                | 7.47                           |
| 300                       | 30          | 50                | 7.30                           |
| 500                       | 10          | 30                | 7.31                           |
| 500                       | 10          | 30                | 7.31                           |
| 500                       | 10          | 30                | 7.07                           |
| 500                       | 10          | 50                | 7.07                           |
| 500                       | 10          | 50                | 7.31                           |
| 500                       | 10          | 50                | 7.31                           |
| 500                       | 30          | 30                | 7.22                           |
| 500                       | 30          | 30                | 7.00                           |
| 500                       | 30          | 30                | 7.47                           |
| 500                       | 30          | 50                | 7.51                           |
| 500                       | 30          | 50                | 7.07                           |
| 500                       | 30          | 50                | 7.07                           |

|     |    |    |      |
|-----|----|----|------|
| 400 | 20 | 40 | 7.30 |
| 400 | 20 | 40 | 7.30 |
| 400 | 20 | 40 | 7.30 |
| 400 | 20 | 40 | 7.30 |
| 400 | 20 | 40 | 7.30 |
| 400 | 20 | 40 | 7.30 |
| 400 | 20 | 40 | 7.51 |
| 400 | 20 | 40 | 7.07 |
| 400 | 20 | 40 | 7.07 |
| 400 | 20 | 40 | 7.07 |
| 400 | 20 | 40 | 7.07 |
| 400 | 20 | 40 | 7.47 |

From statistical analysis, the experimental data were not fitted by the experimental model ( $p = 0.446$ ), with  $R^2 = 0.002$ , while the lack of fit was significant (results not shown). Concentration of AEW was the factor with greater influence on microbial population, showing  $p=0.1086$  (Table S3).

**Table S3.** Interactions of the factorial design 2<sup>3</sup>

|                                | Estimated<br>value | Standard<br>deviation | t Ratio | Prob> t |
|--------------------------------|--------------------|-----------------------|---------|---------|
| Intercept                      | 7.281              | 0.032                 | 226.72  | <.0001* |
| AEW concentration              | -0.055             | 0.032                 | -1.70   | 0.1086  |
| Time                           | 0.015              | 0.032                 | 0.48    | 0.6377  |
| Temperature                    | 0.023              | 0.032                 | 0.71    | 0.4858  |
| Concentration*Time             | -0.019             | 0.032                 | -0.58   | 0.5675  |
| Concentration*Temperature      | -0.026             | 0.032                 | -0.82   | 0.4257  |
| Time*Temperature               | -0.033             | 0.032                 | -1.02   | 0.3206  |
| Concentration*Time*Temperature | 0.029              | 0.032                 | 0.92    | 0.3707  |
